# Supplementary material for: Sulfide-capped wire-like metallaynes as connectors for Au nanoparticle assemblies
Source: Royal Society of Chemistry journal article supplement (doi:10.1039/b412336k), 2004-11-30
Supplement: b412336k.pdf [file b412336k.pdf]

# Electronic Supplementary Information

“Sulfide-capped Wire-like Metallaynes As Connectors for Au Nanoparticle Assemblies”

Jie-Wen Ying, David R. Sobransingh, Guo-Lin Xu, Angel E. Kaifer and Tong Ren

## Experimental

*n*-BuLi and Pd(PPh<sub>3</sub>)<sub>2</sub>Cl<sub>2</sub> were purchased from Aldrich, 1-bromothiophenol, diisopropylamine, triethylamine, iodine, 1,4-dimethoxybenzene, vinyltrimethylsilane, tert-butyl peroxide and copper iodide from ACROS, trimethylsilylacetylene and trimethylsilyl ethynyl iodobenzene from GFS, and silica gel from Merck. Ru<sub>2</sub>(DMBA)<sub>4</sub>(NO<sub>3</sub>)<sub>2</sub> was prepared according to the literature.<sup>1</sup> THF was distilled over Na/benzophenone under an N<sub>2</sub> atmosphere prior to use. <sup>1</sup>H NMR spectra were recorded on a Bruker AVANCE300 NMR spectrometer, with chemical shifts (δ) referenced to the residual CHCl<sub>3</sub>. Infrared spectra were recorded on a Perkin-Elmer 2000 FT-IR spectrometer using KBr disks. Vis-NIR spectra were obtained with a Perkin-Elmer Lambda-900 UV-Vis-NIR spectrophotometer. Cyclic voltammograms were recorded in 0.2 M (*n*-Bu)<sub>4</sub>NPF<sub>6</sub> solution (THF, N<sub>2</sub>-degassed) on a CHI620A voltammetric analyzer with a glassy carbon working electrode (diameter = 2 mm), a Pt-wire auxiliary electrode and a Ag/AgCl reference electrode. The concentration of diruthenium species is always 1.0 mM. The ferrocenium/ferrocene couple was observed at 0.586 V (vs. Ag/AgCl) under experimental conditions.

### 1. Synthesis of H-OPE1

*H*-OPE1 was prepared from literature procedure, and the sample was identified by comparison of NMR data with those reported in literature.<sup>2</sup>

### 2. Synthesis of TMS-OPE2

A solution of 0.500 g (1.4 mmol) of 2-iodo-5-(trimethylsilyl)ethynyl-1,4-dimethoxybenzene, which was prepared using literature procedure with slight modification,<sup>2</sup> and 0.325 g (1.39 mmol) of OPE1, 0.139 g (0.2 mmol) of Pd(PPh<sub>3</sub>)<sub>2</sub>Cl<sub>2</sub>, 0.139 g (0.70 mmol) of CuI, 30 mL of diisopropylamine and 30 mL of THF was stirred under argon at 70 °C overnight. The solvents were removed and the residue was purified by column chromatography with CH<sub>2</sub>Cl<sub>2</sub>/hexanes (1/5, v/v) to yield 0.57 g (88%) of pure product. Data for OPE2: <sup>1</sup>H NMR: 7.47 (*d*, 2H, aromatic), 7.25 (*m*, 2H, aromatic), 6.98 (*d*, 2H, aromatic), 3.88 (*d*, 6H, CH<sub>3</sub>O-), 3.02-2.98 (*m*, 2H, TMSCH<sub>2</sub>CH<sub>2</sub>S-), 0.98-0.95 (*m*, 2H, TMSCH<sub>2</sub>CH<sub>2</sub>S-), 0.29 (*s*, 9H, -Si(CH<sub>3</sub>)<sub>3</sub>), 0.09 (*s*, 9H, -Si(CH<sub>3</sub>)<sub>3</sub>).

### 3. Synthesis of TMS-OPE3

A mixture of 0.500 g (1.27 mmol) of *H*-OPE2, which was prepared by desilylation of TMS-OPE2 with excess of K<sub>2</sub>CO<sub>3</sub> in THF/CH<sub>3</sub>OH (1/1, v/v), and 0.38 g (1.27 mmol) of trimethylsilyl ethynyl iodobenzene, 0.150 g (0.21 mmol) of Pd(PPh<sub>3</sub>)<sub>2</sub>Cl<sub>2</sub>, 0.150 g (0.8 mmol) of CuI, 40 mL of diisopropylamine and 40 mL of THF was stirred under argon at 70 °C overnight. Solvents were removed and the residue was purified by column chromatography with CH<sub>2</sub>Cl<sub>2</sub>/hexanes (1/5, v/v) to yield 0.550 g (76%) of pure product. Data for TMS-OPE3: <sup>1</sup>H NMR: 7.50–7.42 (*m*, 7H, aromatic), 7.25-7.22 (*m*, 1H, aromatic), 7.01 (*d*, 2H, aromatic), 3.89 (*d*,

6H, CH<sub>3</sub>O-), 3.01-2.95 (*m*, 2H, TMSCH<sub>2</sub>CH<sub>2</sub>S-), 0.97-0.91 (*m*, 2H, TMSCH<sub>2</sub>CH<sub>2</sub>S-), 0.25 (*s*, 9H, -Si(CH<sub>3</sub>)<sub>3</sub>), 0.05 (*s*, 9H, -Si(CH<sub>3</sub>)<sub>3</sub>).

#### 4. Synthesis of Ru<sub>2</sub>(DMBA)<sub>4</sub>(OPE1)<sub>2</sub>

To a suspension of 0.200 g (0.22 mmol) of Ru<sub>2</sub>(DMBA)<sub>4</sub>(NO<sub>3</sub>)<sub>2</sub> in 50mL THF was added 0.500 g (2.14mmol) of *H*-OPE1 and 20mL of Et<sub>3</sub>N. The reaction mixture was stirred at room temperature for 2h. Upon the solvent removal, the residue was triturated with methanol and filtered to afford a red powder 0.180 g (73%). Data for Ru<sub>2</sub>(DMBA)<sub>4</sub>(OPE1)<sub>2</sub>: <sup>1</sup>H NMR: 7.42-7.36 (*m*, 12H, aromatic), 7.14 (*d*, 4H, aromatic), 6.99 (*t*, 12H, aromatic), 3.26 (*s*, 24H, MeN-), 2.85 – 2.79 (*m*, 4H, TMSCH<sub>2</sub>CH<sub>2</sub>S-), 0.87 – 0.80 (*m*, 4H, TMSCH<sub>2</sub>CH<sub>2</sub>S-), 0.03 (*s*, 18H, -Si(CH<sub>3</sub>)<sub>3</sub>); MS-FAB (*m/e*, based on <sup>101</sup>Ru): 1262 [M<sup>+</sup>H]; Vis-NIR, λ<sub>max</sub>(nm, ε(M<sup>-1</sup>cm<sup>-1</sup>)): 890(1,660), 510(12,130), 340(37,130); IR (cm<sup>-1</sup>): ν(≡CH) 2078.0 (*s*) ; Electrochemistry, E<sub>1/2</sub>/V, ΔE<sub>p</sub>/V, *i*<sub>backward</sub>/*i*<sub>forward</sub>: **A**, 0.517, 0.057, 0.960; **B**, -1.060, 0.057, 0.939. E<sub>g</sub>: 1.58

#### 5. Synthesis of Ru<sub>2</sub>(DMBA)<sub>4</sub>(OPE2)<sub>2</sub>

To a suspension of 0.160 g (0.18 mmol) of Ru<sub>2</sub>(DMBA)<sub>4</sub>(NO<sub>3</sub>)<sub>2</sub> in 50 mL THF was added 0.496 g (1.06 mmol) of *H*-OPE2 and 20mL Et<sub>3</sub>N. The reaction mixture was stirred at room temperature for 2h. Upon the solvent removal, the residue was purified by column chromatography, and eluted with THF/hexanes (1/5, v/v) to afford 0.108 g (38%) title compound as red crystalline solid. Data for Ru<sub>2</sub>(DMBA)<sub>4</sub>(OPE2)<sub>2</sub>: <sup>1</sup>H NMR: 7.48-7.41 (*m*, 16H, aromatic), 7.21 (*d*, 4H, aromatic), 7.05 (*d*, 8H, 6.90 aromatic), 6.89 (*s*, 2H, aromatic), 6.63 (*s*, 2H, aromatic), 3.80 (*s*, 6H, CH<sub>3</sub>O-), 3.70 (*s*, 6H, CH<sub>3</sub>O-), 3.35 (*s*, 24H, MeN-), 2.99 – 2.94 (*m*, 4H, TMSCH<sub>2</sub>CH<sub>2</sub>S-), 0.95 – 0.83 (*m*, 4H, TMSCH<sub>2</sub>CH<sub>2</sub>S-), 0.04 (*s*, 9H, -Si(CH<sub>3</sub>)<sub>3</sub>), 0.01 (*s*, 9H,

-Si(CH<sub>3</sub>)<sub>3</sub>); MS-FAB (m/e, based on <sup>101</sup>Ru): 1581 [M<sup>+</sup>H]; Vis-NIR, λ<sub>max</sub>(nm, ε(M<sup>-1</sup>cm<sup>-1</sup>)): 870(2,225), 500(18,120), 400(61,880); IR (cm<sup>-1</sup>): ν(≡CH) 2068.5 (s) ; Electrochemistry, E<sub>1/2</sub>/V, ΔE<sub>p</sub>/V, i<sub>backward</sub>/i<sub>forward</sub>: **A**, 0.478, 0.061, 0.988; **B**, -1.056, 0.061, 0.885. E<sub>g</sub>: 1.534

#### 6. Synthesis of Ru<sub>2</sub>(DMBA)<sub>4</sub>(OPE3)<sub>2</sub>

To a suspension of 0.200 g (0.22 mmol) of Ru<sub>2</sub>(DMBA)<sub>4</sub>(NO<sub>3</sub>)<sub>2</sub> in 50 mL THF was added 0.680 g (1.38 mmol) of *H*-OPE3, prepared from desilylation of *TMS*-OPE3 with excess of K<sub>2</sub>CO<sub>3</sub> in THF/CH<sub>3</sub>OH (1/1, v/v), and 20 mL Et<sub>3</sub>N. The reaction mixture was stirred at room temperature for 2h. Upon the solvent removal, the residue was purified by column chromatography, and eluted with THF/hexanes (1/5, v/v) to afford 0.130 g title compound (33%).

Data for Ru<sub>2</sub>(DMBA)<sub>4</sub>(OPE3)<sub>2</sub>: <sup>1</sup>H NMR: 7.49-7.39 (*m*, 20H, aromatic), 7.28 - 7.26 (*m*, 4H, aromatic), 6.93 - 7.05 (*m*, 16H, 6.90 aromatic), 3.90 (*s*, 12H, CH<sub>3</sub>O-), 3.32 (*s*, 24H, MeN-), 3.03 - 2.97 (*m*, 4H, TMSCH<sub>2</sub>CH<sub>2</sub>S-), 0.99 - 0.86 (*m*, 4H, TMSCH<sub>2</sub>CH<sub>2</sub>S-), 0.07 (*s*, 9H, -Si(CH<sub>3</sub>)<sub>3</sub>), 0.02 (*s*, 9H, -Si(CH<sub>3</sub>)<sub>3</sub>); MS-FAB (m/e, based on <sup>101</sup>Ru): 1283 [M<sup>+</sup> - OPE3]; Vis-NIR, λ<sub>max</sub>(nm, ε(M<sup>-1</sup>cm<sup>-1</sup>)): 860(3,489), 510(sh), 380(99,020); IR (cm<sup>-1</sup>): ν(≡CH) 2069.3 (s) ; Electrochemistry, E<sub>1/2</sub>/V, ΔE<sub>p</sub>/V, i<sub>backward</sub>/i<sub>forward</sub>: **A**, 0.530, 0.073, 0.987; **B**, -1.047, 0.075, 0.887. E<sub>g</sub>: 1.577

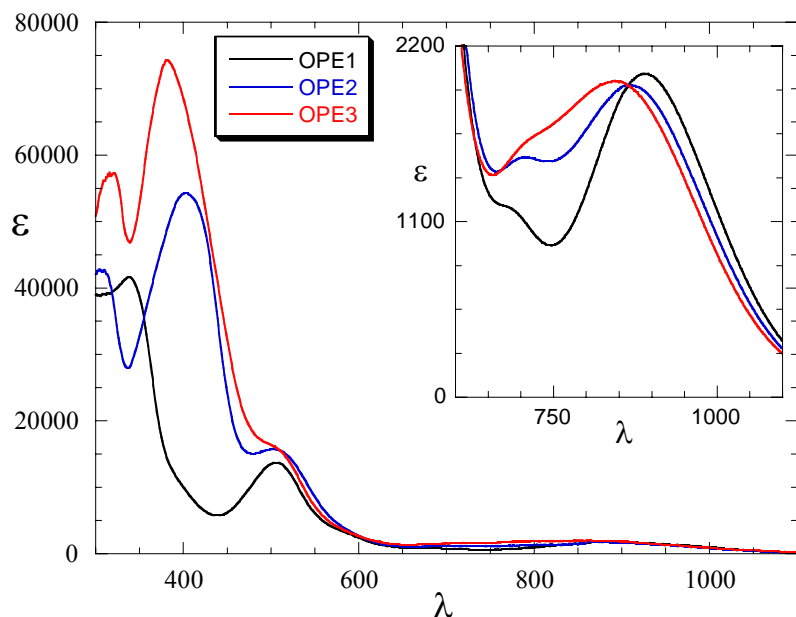

Figure ESI1. UV-Vis-NIR spectra of metallaynes  $\text{Ru}_2(\text{DMBA})_4(\text{OPE1})_2$ ,  $\text{Ru}_2(\text{DMBA})_4(\text{OPE2})_2$  and  $\text{Ru}_2(\text{DMBA})_4(\text{OPE3})_2$ , recorded in THF.

*Preparation of Gold Nanoparticles.*

A 1.0 mM solution of  $\text{HAuCl}_4$  (250 mL) was brought to a rolling boil with vigorous stirring. A solution of 2% sodium citrate (25 mL) was added rapidly to the  $\text{HAuCl}_4$  solution, giving rise to a dramatic color change from pale yellow to burgundy. Boiling and vigorous stirring was continued for 10 minutes. The gold nanoparticles in the final solution were characterized by UV-visible spectroscopy ( $\lambda_{\text{max}} = 518 \text{ nm}$ ) and TEM (average particle size of  $11.6 \pm 1.6 \text{ nm}$ ) in excellent agreement with the original report.<sup>3</sup>

*Linker solution preparation.*

Linker solutions were prepared by dissolving 0.5 mg of  $\text{Ru}_2$  metallayne linker in 0.2 mL THF followed by the addition of ethanol (1 mL) and water (7 mL) in that order.

*Nanoparticle assembly.*

A 1.0-mL aliquot of colloidal gold solution was diluted to 10 mL and linker solution was added in 10- $\mu$ L aliquots, with continuous stirring over a period of about 30 minutes. The reaction was followed by UV-visible spectroscopy and the addition of the linker was stopped once the wavelength of maximum absorption for the surface plasmon resonance band of the gold nanoparticles shifted from 518 nm to 525 nm (Figure SI2). Excess linker leads to extensive aggregation of the gold nanoparticles. However, energy dispersive spectroscopic analysis reveals the presence of Ru in the aggregates (Figure SI3), providing additional support for the tethering action of the Ru<sub>2</sub> metallayne compounds. Furthermore, control experiments with similar compounds containing a single sulfide terminal group did not allow the observation of nanoparticle dimers or chains.

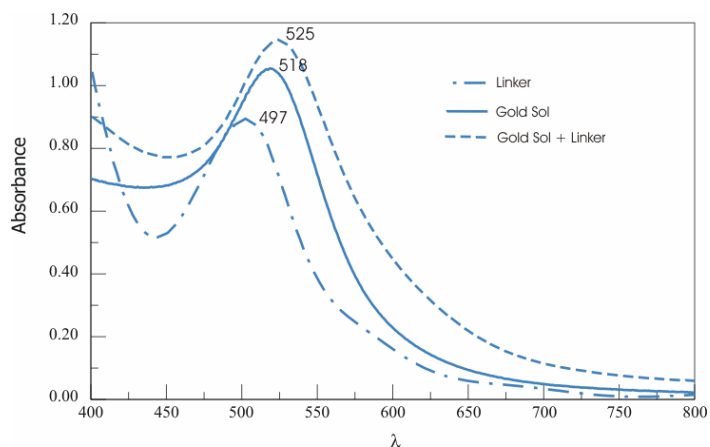

Figure ESI2. Typical visible spectra of the gold nanoparticle solution before and after controlled addition of the shortest linker. Similar spectra with obtained with all the linker compounds. The spectrum of the linker in the absence of nanoparticles is also shown.

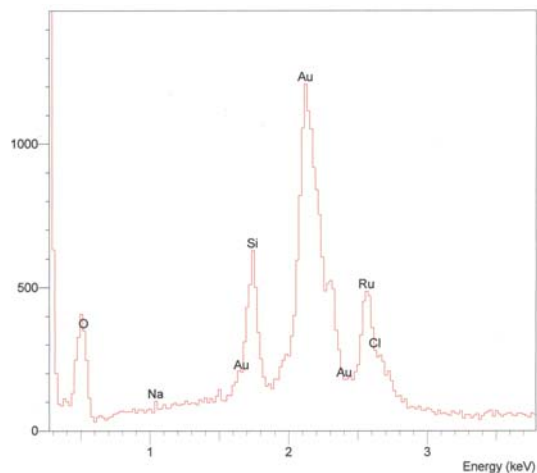

Figure ESI3. Energy dispersive spectrum of Au nanoparticle aggregates obtained by addition of excess **1**.

*TEM*

One or two drops of linked gold nanoparticle solution were placed on a formvar coated copper grid in contact with filter paper for imaging.

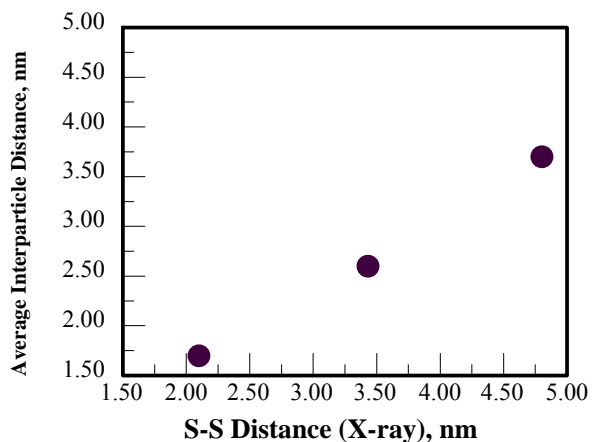

Figure ESI4. Dependence of the average interparticle distance (as measured in TEM experiments) on the S-S distance of the corresponding Ru<sub>2</sub> metallayne linker.

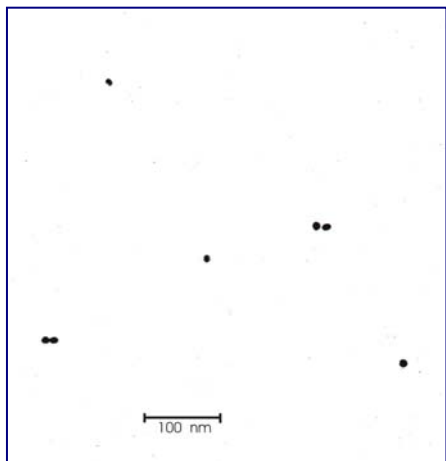

Figure ES15. TEM showing a larger field that captures two dimers and three single nanoparticles. This image was obtained with the longest linker.



Table S1. Crystallographic parameters for compounds **1**C<sub>6</sub>H<sub>14</sub> and **2**:2C<sub>6</sub>H<sub>14</sub>

|                                                               | <b>1</b> C <sub>6</sub> H <sub>14</sub>                                                       | <b>2</b> :2C <sub>6</sub> H <sub>14</sub>                                                                     |
|---------------------------------------------------------------|-----------------------------------------------------------------------------------------------|---------------------------------------------------------------------------------------------------------------|
| Formula                                                       | C <sub>68</sub> H <sub>92</sub> N <sub>8</sub> Ru <sub>2</sub> S <sub>2</sub> Si <sub>2</sub> | C <sub>88</sub> H <sub>108</sub> N <sub>8</sub> O <sub>4</sub> Ru <sub>2</sub> S <sub>2</sub> Si <sub>2</sub> |
| fw                                                            | 1343.9                                                                                        | 1664.3                                                                                                        |
| Space group                                                   | <i>C</i> 2                                                                                    | <i>P</i> $\bar{1}$                                                                                            |
| <i>a</i> (Å)                                                  | 11.219(2)                                                                                     | 12.976(1)                                                                                                     |
| <i>b</i> (Å)                                                  | 18.897(3)                                                                                     | 13.840(1)                                                                                                     |
| <i>c</i> (Å)                                                  | 16.872(3)                                                                                     | 14.245(1)                                                                                                     |
| $\alpha$ (°)                                                  | 90                                                                                            | 106.950(2)                                                                                                    |
| $\beta$ (°)                                                   | 106.173(3)                                                                                    | 104.661(2)                                                                                                    |
| $\gamma$ (°)                                                  | 90                                                                                            | 107.477(2)                                                                                                    |
| Volume (Å <sup>3</sup> )                                      | 3435.6(9)                                                                                     | 2165.2(3)                                                                                                     |
| <i>Z</i>                                                      | 2                                                                                             | 1                                                                                                             |
| <i>d</i> <sub>calc.</sub> (gcm <sup>-3</sup> )                | 1.299                                                                                         | 1.276                                                                                                         |
| $\mu$ (mm <sup>-1</sup> )                                     | 0.580                                                                                         | 0.477                                                                                                         |
| Radiation                                                     | MoK $\alpha$                                                                                  | MoK $\alpha$                                                                                                  |
| T (K)                                                         | 300(2)                                                                                        | 300(2)                                                                                                        |
| <i>R</i> 1, <i>wR</i> 2 ( <i>I</i> > 2 $\sigma$ ( <i>I</i> )) | 0.041, 0.095                                                                                  | 0.060, 0.12                                                                                                   |

Table S2. Selected bond lengths (Å) and angles (°) for compounds **1** and **2**

|           | <b>1</b>   | <b>2</b>   |
|-----------|------------|------------|
| Ru-Ru'    | 2.4597(8)  | 2.4626(8)  |
| Ru-C1     | 1.995(5)   | 1.968(5)   |
| Ru-N1     | 1.907(14)  | 1.996(4)   |
| Ru-N2     | 2.074(13)  | 1.977(4)   |
| Ru-N3     | 2.181(12)  | 2.103(4)   |
| Ru-N4     | 2.064(14)  | 2.101(4)   |
| C1-C2     | 1.204(7)   | 1.207(7)   |
| C1-Ru-Ru' | 160.19(17) | 161.38(17) |
| C2-C1-Ru  | 172.6(5)   | 174.6(5)   |
| N1-Ru-Ru' | 96.5(4)    | 95.73(11)  |
| N2-Ru-Ru' | 96.3(4)    | 97.08(12)  |
| N3-Ru-Ru' | 80.0(4)    | 80.09(11)  |
| N4-Ru-Ru' | 79.4(4)    | 78.86(11)  |

**References:**

- (1) Xu, G.-L.; Jablonski, C. G.; Ren, T. *Inorg. Chim. Acta* **2003**, *343*, 387.
- (2) Yu, C. J.; Chong, Y. C.; Kayyem, J. F.; Gozin, M. *J. Org. Chem.* **1999**, *64*, 2070.
- (3) Grabar, K. C.; Freeman, R. G.; Hommer, M. B.; Natan, M. J. *Anal. Chem.* **1995**, *67*, 735.
